# Supplementary material for: An infrared spectral signature of human lymphocyte subpopulations from peripheral blood
Source: Royal Society of Chemistry journal article supplement (doi:10.1039/c4an02247e), 2014-12-15
Supplement: c4an02247e1.pdf [file c4an02247e1.pdf]

### Infrared spectral signature of human lymphocyte subpopulations from peripheral blood

N. Wald, A. Legat, C Meyer, D. E. Speiser and E. Goormaghtigh

To fully demonstrate that spectral differences in purified lymphocyte fractions cannot be due to spectral differences originating from the antibodies themselves, we recorded infrared images of a smear of anti-CD4 antibody and a smear of anti-CD8 antibody, both coupled to the magnetic beads. Figure S1 demonstrates that spectra of the antibodies coupled to the beads were essentially identical (see figure S1 below)

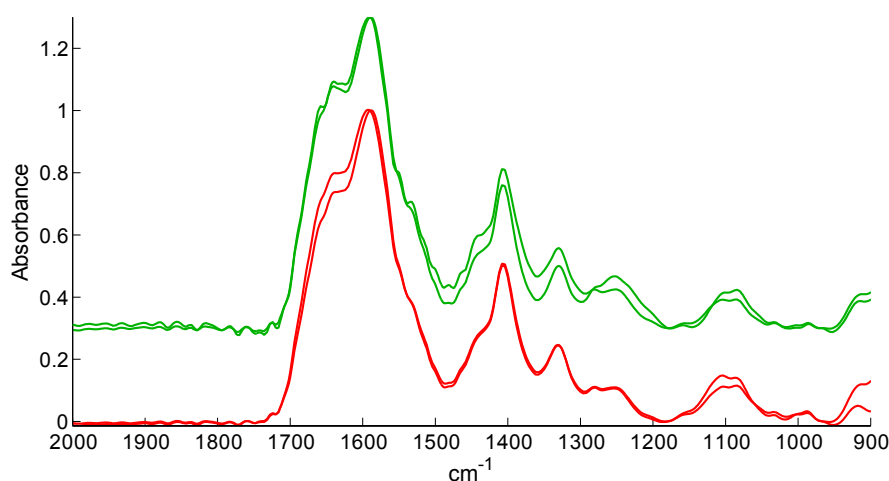

*Figure S1: mean infrared spectra of two 64x64 images of a smear of anti-CD8 antibodies (red) and two 64x64 images of a smear of anti-CD4 antibodies (green). Both antibodies were coupled to magnetic beads as described in Materials and methods*

A final argument ruling out a differential contributions from the antibodies is that the F-statistics provided in Figure 6 do not highlight the 1700-1500  $\text{cm}^{-1}$  region where antibody-bead complex absorbance is at its maximum. We can therefore be confident that the differences observed between cell types is not related to the antibodies used to isolate them.
